# Supplementary material for: A Randomized Trial Examining the Effectiveness of Switching From Olanzapine, Quetiapine, or Risperidone to Aripiprazole to Reduce Metabolic Risk: Comparison of Antipsychotics for Metabolic Problems (CAMP)
Source: Atypon-hosted journal article supplement (doi:10.1176/appi.ajp.2011.10111609), 2011-07-19
Supplement: ajp_168_09_947_01.pdf [file ajp_168_09_947_01.pdf]

**CONFIDENTIAL: CAMP PRIMARY OUTCOME RESULTS**

**Table 1 (supplement). Baseline Demographic and Clinical Characteristics of Randomized Patients**

|                                       | <i>Olanzapine</i>       |      |                          |      |                        |      | <i>Quetiapine</i>       |       |                          |      |                        |       | <i>Risperidone</i>      |      |                          |      |                        |       |
|---------------------------------------|-------------------------|------|--------------------------|------|------------------------|------|-------------------------|-------|--------------------------|------|------------------------|-------|-------------------------|------|--------------------------|------|------------------------|-------|
|                                       | <i>Total<br/>(N=74)</i> |      | <i>Switch<br/>(N=38)</i> |      | <i>Stay<br/>(N=36)</i> |      | <i>Total<br/>(N=60)</i> |       | <i>Switch<br/>(N=30)</i> |      | <i>Stay<br/>(N=30)</i> |       | <i>Total<br/>(N=81)</i> |      | <i>Switch<br/>(N=41)</i> |      | <i>Stay<br/>(N=40)</i> |       |
| <b>Demographic characteristics</b>    | Mean                    | SD   | Mean                     | SD   | Mean                   | SD   | Mean                    | SD    | Mean                     | SD   | Mean                   | SD    | Mean                    | SD   | Mean                     | SD   | Mean                   | SD    |
| Age - yr                              | 42                      | 11.8 | 41                       | 12.8 | 42                     | 10.8 | 42                      | 10.0  | 41                       | 10.6 | 43                     | 9.4   | 40                      | 11.4 | 39                       | 11.5 | 41                     | 11.3  |
| Education - yr                        | 12                      | 2.5  | 12                       | 2.5  | 12                     | 2.6  | 12                      | 2.2   | 12                       | 1.4  | 13                     | 2.8   | 13                      | 2.6  | 13                       | 2.6  | 13                     | 2.6   |
|                                       | N                       | %    | N                        | %    | N                      | %    | N                       | %     | N                        | %    | N                      | %     | N                       | %    | N                        | %    | N                      | %     |
| <b>Sex</b>                            |                         |      |                          |      |                        |      |                         |       |                          |      |                        |       |                         |      |                          |      |                        |       |
| Male                                  | 49                      | 66.2 | 25                       | 65.8 | 24                     | 66.7 | 32                      | 53.3  | 14                       | 46.7 | 18                     | 60.0  | 56                      | 69.1 | 29                       | 70.7 | 27                     | 67.5  |
| Female                                | 25                      | 33.8 | 13                       | 34.2 | 12                     | 33.3 | 28                      | 46.7  | 16                       | 53.3 | 12                     | 40.0  | 25                      | 30.9 | 12                       | 29.3 | 13                     | 32.5  |
| <b>Race</b>                           |                         |      |                          |      |                        |      |                         |       |                          |      |                        |       |                         |      |                          |      |                        |       |
| White                                 | 42                      | 56.8 | 20                       | 52.6 | 22                     | 61.1 | 32                      | 53.3  | 18                       | 60.0 | 14                     | 46.7  | 49                      | 60.5 | 27                       | 65.9 | 22                     | 55.0  |
| Black                                 | 28                      | 37.8 | 16                       | 42.1 | 12                     | 33.3 | 24                      | 40.0  | 10                       | 33.3 | 14                     | 46.7  | 28                      | 34.6 | 13                       | 31.7 | 15                     | 37.5  |
| Other                                 | 2                       | 2.7  | 1                        | 2.6  | 1                      | 2.8  | 4                       | 6.7   | 2                        | 6.7  | 2                      | 6.7   | 4                       | 4.9  | 1                        | 2.4  | 3                      | 7.5   |
| Spanish, Hispanic or Latino ethnicity | 12                      | 16.2 | 4                        | 10.5 | 8                      | 22.2 | 9                       | 15.0  | 5                        | 16.7 | 4                      | 13.3  | 18                      | 22.2 | 10                       | 24.4 | 8                      | 20.0  |
| High school education or above        | 52                      | 70.3 | 28                       | 73.7 | 24                     | 66.7 | 47                      | 78.3  | 22                       | 73.3 | 25                     | 83.3  | 67                      | 82.7 | 33                       | 80.5 | 34                     | 85.0  |
| <b>Marital Status</b>                 |                         |      |                          |      |                        |      |                         |       |                          |      |                        |       |                         |      |                          |      |                        |       |
| Married                               | 4                       | 5.4  | 4                        | 10.5 |                        |      | 7                       | 11.7  | 3                        | 10.0 | 4                      | 13.3  | 5                       | 6.2  | 2                        | 4.9  | 3                      | 7.5   |
| Previously Married                    | 17                      | 23.0 | 9                        | 23.7 | 8                      | 22.2 | 26                      | 43.3  | 11                       | 36.7 | 15                     | 50.0  | 23                      | 28.4 | 13                       | 31.7 | 10                     | 25.0  |
| Never Married                         | 53                      | 71.6 | 25                       | 65.8 | 28                     | 77.8 | 27                      | 45.0  | 16                       | 53.3 | 11                     | 36.7  | 53                      | 65.4 | 26                       | 63.4 | 27                     | 67.5  |
| <b>Living Situation</b>               |                         |      |                          |      |                        |      |                         |       |                          |      |                        |       |                         |      |                          |      |                        |       |
| Independent/non-structured            | 59                      | 79.7 | 31                       | 81.6 | 28                     | 77.8 | 53                      | 88.3  | 27                       | 90.0 | 26                     | 86.7  | 65                      | 80.2 | 32                       | 78.0 | 33                     | 82.5  |
| Other                                 | 15                      | 20.3 | 7                        | 18.4 | 8                      | 22.2 | 7                       | 11.7  | 3                        | 10.0 | 4                      | 13.3  | 16                      | 19.8 | 9                        | 22.0 | 7                      | 17.5  |
| <b>Clinical characteristics</b>       | Mean                    | SD   | Mean                     | SD   | Mean                   | SD   | Mean                    | SD    | Mean                     | SD   | Mean                   | SD    | Mean                    | SD   | Mean                     | SD   | Mean                   | SD    |
| Non-HDL Cholesterol - mg/dL           | 181                     | 35.8 | 180                      | 38.9 | 181                    | 32.6 | 173                     | 33.5  | 165                      | 24.9 | 181                    | 39.1  | 165                     | 27.9 | 163                      | 27.1 | 168                    | 28.7  |
| HDL Cholesterol - mg/dL               | 44                      | 10.2 | 45                       | 10.8 | 43                     | 9.6  | 44                      | 11.1  | 43                       | 13.1 | 45                     | 8.9   | 44                      | 12.6 | 46                       | 13.5 | 43                     | 11.6  |
| Weight - kg                           | 96                      | 16.2 | 101                      | 16.0 | 92                     | 15.2 | 110                     | 22.3  | 110                      | 21.4 | 109                    | 23.6  | 105                     | 21.4 | 103                      | 23.8 | 107                    | 18.9  |
| Body Mass Index                       | 33                      | 4.9  | 34                       | 5.4  | 32                     | 3.9  | 37                      | 7.8   | 37                       | 7.6  | 37                     | 8.2   | 35                      | 6.1  | 35                       | 5.9  | 36                     | 6.3   |
| Total Cholesterol - mg/dL             | 225                     | 37.2 | 224                      | 39.9 | 225                    | 34.6 | 217                     | 31.3  | 208                      | 24.1 | 225                    | 35.5  | 210                     | 29.6 | 208                      | 31.2 | 211                    | 28.1  |
| LDL Cholesterol - mg/dL               | 149                     | 31.6 | 148                      | 29.7 | 151                    | 33.7 | 138                     | 25.8  | 133                      | 19.7 | 145                    | 30.3  | 132                     | 23.5 | 132                      | 23.2 | 132                    | 24.2  |
| Triglycerides - mg/dL                 | 161                     | 79.2 | 169                      | 94.0 | 153                    | 60.2 | 180                     | 106.5 | 161                      | 88.8 | 199                    | 120.2 | 166                     | 97.2 | 156                      | 85.4 | 177                    | 108.0 |
| TG/HDL ratio                          | 4                       | 2.5  | 4                        | 2.8  | 4                      | 2.2  | 5                       | 3.3   | 4                        | 3.2  | 5                      | 3.5   | 4                       | 3.4  | 4                        | 3.0  | 5                      | 3.8   |
| HbA1c - %                             | 6                       | 0.4  | 6                        | 0.4  | 6                      | 0.3  | 6                       | 0.5   | 6                        | 0.6  | 5                      | 0.4   | 5                       | 0.5  | 5                        | 0.4  | 5                      | 0.5   |
| Fasting glucose - mg/dL               | 96                      | 11.5 | 95                       | 11.8 | 97                     | 11.1 | 96                      | 11.3  | 98                       | 10.8 | 95                     | 11.7  | 97                      | 11.6 | 96                       | 9.6  | 98                     | 13.3  |

**CONFIDENTIAL: CAMP PRIMARY OUTCOME RESULTS**

**Table 1 (supplement). Baseline Demographic and Clinical Characteristics of Randomized Patients**

|                         | <i>Olanzapine</i>       |       |                          |       |                        |       | <i>Quetiapine</i>       |      |                          |      |                        |      | <i>Risperidone</i>      |      |                          |      |                        |      |
|-------------------------|-------------------------|-------|--------------------------|-------|------------------------|-------|-------------------------|------|--------------------------|------|------------------------|------|-------------------------|------|--------------------------|------|------------------------|------|
|                         | <i>Total<br/>(N=74)</i> |       | <i>Switch<br/>(N=38)</i> |       | <i>Stay<br/>(N=36)</i> |       | <i>Total<br/>(N=60)</i> |      | <i>Switch<br/>(N=30)</i> |      | <i>Stay<br/>(N=30)</i> |      | <i>Total<br/>(N=81)</i> |      | <i>Switch<br/>(N=41)</i> |      | <i>Stay<br/>(N=40)</i> |      |
| 2-hour glucose - mg/dL  | 132                     | 37.9  | 128                      | 30.8  | 135                    | 44.3  | 127                     | 43.2 | 128                      | 42.6 | 125                    | 44.5 | 122                     | 42.3 | 123                      | 40.7 | 121                    | 44.3 |
| Fasting insulin - mU/L  | 15                      | 12.4  | 15                       | 9.8   | 15                     | 14.9  | 16                      | 13.3 | 19                       | 13.7 | 14                     | 12.7 | 17                      | 13.5 | 14                       | 8.5  | 21                     | 16.9 |
| 2-hour insulin - mU/L   | 103                     | 139.4 | 111                      | 142.9 | 96                     | 137.2 | 79                      | 86.1 | 88                       | 98.4 | 70                     | 72.4 | 78                      | 71.6 | 77                       | 81.2 | 79                     | 61.4 |
| C-reactive protein      | 6                       | 7.4   | 8                        | 9.3   | 5                      | 4.1   | 8                       | 9.9  | 9                        | 10.3 | 8                      | 9.5  | 6                       | 8.3  | 4                        | 5.6  | 7                      | 10.3 |
| PANSS Total             | 67                      | 14.9  | 68                       | 14.1  | 66                     | 15.8  | 67                      | 15.0 | 64                       | 11.9 | 70                     | 17.0 | 64                      | 18.5 | 63                       | 19.9 | 66                     | 17.0 |
| CGI-Severity score      | 4                       | 0.8   | 4                        | 0.8   | 4                      | 0.8   | 4                       | 0.9  | 4                        | 0.9  | 4                      | 1.0  | 4                       | 0.9  | 3                        | 1.0  | 4                      | 0.9  |
| SF-12 mntl health score | 48                      | 10.6  | 47                       | 10.7  | 49                     | 10.4  | 40                      | 11.1 | 40                       | 11.3 | 41                     | 11.0 | 46                      | 11.6 | 44                       | 11.6 | 48                     | 11.2 |
| SF-12 phys health score | 47                      | 10.0  | 48                       | 10.7  | 46                     | 9.3   | 43                      | 10.9 | 44                       | 9.8  | 42                     | 11.9 | 46                      | 9.9  | 47                       | 9.2  | 45                     | 10.6 |
| IWQoL Total             | 60                      | 28.0  | 63                       | 32.4  | 57                     | 22.7  | 73                      | 30.0 | 75                       | 28.9 | 71                     | 31.5 | 65                      | 27.8 | 60                       | 23.8 | 70                     | 30.9 |
