# Supplementary material for: A Randomized Trial Examining the Effectiveness of Switching From Olanzapine, Quetiapine, or Risperidone to Aripiprazole to Reduce Metabolic Risk: Comparison of Antipsychotics for Metabolic Problems (CAMP)
Source: Atypon-hosted journal article supplement (doi:10.1176/appi.ajp.2011.10111609), 2011-07-19
Supplement: ajp_168_09_947_03.pdf [file ajp_168_09_947_03.pdf]

**CONFIDENTIAL: CAMP PRIMARY OUTCOME RESULTS**  
**Table 3 (supplement). CAMP General Safety Summary**

|                                                                        | Olanzapine      |      |                  |      |                |      | Quetiapine      |      |                  |      |                |      | Risperidone     |      |                  |      |                |      |
|------------------------------------------------------------------------|-----------------|------|------------------|------|----------------|------|-----------------|------|------------------|------|----------------|------|-----------------|------|------------------|------|----------------|------|
|                                                                        | Total<br>(N=74) |      | Switch<br>(N=38) |      | Stay<br>(N=36) |      | Total<br>(N=59) |      | Switch<br>(N=29) |      | Stay<br>(N=30) |      | Total<br>(N=80) |      | Switch<br>(N=40) |      | Stay<br>(N=40) |      |
|                                                                        | N               | %    | N                | %    | N              | %    | N               | %    | N                | %    | N              | %    | N               | %    | N                | %    | N              | %    |
| Protocol-specified efficacy failure                                    | 10              | 13.5 | 7                | 18.4 | 3              | 8.3  | 17              | 28.8 | 8                | 27.6 | 9              | 30.0 | 13              | 16.3 | 7                | 17.5 | 6              | 15.0 |
| Early discontinuation of protocol-specified treatment                  | 25              | 33.8 | 21               | 55.3 | 4              | 11.1 | 29              | 49.2 | 17               | 58.6 | 12             | 40.0 | 26              | 32.5 | 13               | 32.5 | 13             | 32.5 |
| Discontinuation of study antipsychotic due to any cause                | 23              | 31.1 | 19               | 50.0 | 4              | 11.1 | 28              | 47.5 | 16               | 55.2 | 12             | 40.0 | 22              | 27.5 | 12               | 30.0 | 10             | 25.0 |
| Discontinuation of study antipsychotic due to inefficacy               | 14              | 18.9 | 14               | 36.8 | 0              | 0.0  | 4               | 6.8  | 2                | 6.9  | 2              | 6.7  | 3               | 3.8  | 2                | 5.0  | 1              | 2.5  |
| Discontinuation of study antipsychotic due to intolerability           | 1               | 1.4  | 1                | 2.6  | 0              | 0.0  | 9               | 15.3 | 5                | 17.2 | 4              | 13.3 | 3               | 3.8  | 1                | 2.5  | 2              | 5.0  |
| Dropped out - no information available                                 | 5               | 6.8  | 3                | 7.9  | 2              | 5.6  | 8               | 13.6 | 6                | 20.7 | 2              | 6.7  | 10              | 12.5 | 6                | 15.0 | 4              | 10.0 |
| Dropped out due to withdrawn consent                                   | 2               | 2.7  | 0                | 0.0  | 2              | 5.6  | 7               | 11.9 | 3                | 10.3 | 4              | 13.3 | 5               | 6.3  | 2                | 5.0  | 3              | 7.5  |
| Discontinuation of study antipsychotic due to other reasons            | 1               | 1.4  | 1                | 2.6  | 0              | 0.0  | 0               | 0.0  | 0                | 0.0  | 0              | 0.0  | 1               | 1.3  | 1                | 2.5  | 0              | 0.0  |
| Participants with any SAE*                                             | 7               | 9.5  | 7                | 18.4 | 0              | 0.0  | 12              | 20.3 | 8                | 27.6 | 4              | 13.3 | 9               | 11.3 | 3                | 7.5  | 6              | 15.0 |
| Participants with any psychiatric hospitalization                      | 3               | 4.1  | 3                | 7.9  | 0              | 0.0  | 5               | 8.5  | 3                | 10.3 | 2              | 6.7  | 5               | 6.3  | 2                | 5.0  | 3              | 7.5  |
| Deaths                                                                 | 0               | 0.0  | 0                | 0.0  | 0              | 0.0  | 0               | 0.0  | 0                | 0.0  | 0              | 0.0  | 0               | 0.0  | 0                | 0.0  | 0              | 0.0  |
| Participants with any AE <sup>+</sup>                                  | 49              | 66.2 | 28               | 73.7 | 21             | 58.3 | 49              | 83.1 | 24               | 82.8 | 25             | 83.3 | 62              | 77.5 | 29               | 72.5 | 33             | 82.5 |
| Participants with at least one AE from Systematic Inquiry <sup>+</sup> | 48              | 64.9 | 27               | 71.1 | 21             | 58.3 | 48              | 81.4 | 23               | 79.3 | 25             | 83.3 | 58              | 72.5 | 27               | 67.5 | 31             | 77.5 |
| Insomnia                                                               | 18              | 24.3 | 11               | 28.9 | 7              | 19.4 | 29              | 49.2 | 17               | 58.6 | 12             | 40.0 | 26              | 32.5 | 16               | 40.0 | 10             | 25.0 |
| Sleepiness                                                             | 17              | 23.0 | 9                | 23.7 | 8              | 22.2 | 20              | 33.9 | 7                | 24.1 | 13             | 43.3 | 25              | 31.3 | 11               | 27.5 | 14             | 35.0 |
| Dry mouth                                                              | 13              | 17.6 | 6                | 15.8 | 7              | 19.4 | 24              | 40.7 | 11               | 37.9 | 13             | 43.3 | 23              | 28.8 | 7                | 17.5 | 16             | 40.0 |
| Akathisia/activation                                                   | 11              | 14.9 | 8                | 21.1 | 3              | 8.3  | 23              | 39.0 | 10               | 34.5 | 13             | 43.3 | 21              | 26.3 | 11               | 27.5 | 10             | 25.0 |
| Problems with sex drive                                                | 12              | 16.2 | 6                | 15.8 | 6              | 16.7 | 21              | 35.6 | 10               | 34.5 | 11             | 36.7 | 17              | 21.3 | 8                | 20.0 | 9              | 22.5 |
| Increased appetite                                                     | 14              | 18.9 | 8                | 21.1 | 6              | 16.7 | 15              | 25.4 | 6                | 20.7 | 9              | 30.0 | 15              | 18.8 | 4                | 10.0 | 11             | 27.5 |
| Weight gain                                                            | 14              | 18.9 | 7                | 18.4 | 7              | 19.4 | 18              | 30.5 | 9                | 31.0 | 9              | 30.0 | 9               | 11.3 | 4                | 10.0 | 5              | 12.5 |
| Constipation                                                           | 12              | 16.2 | 4                | 10.5 | 8              | 22.2 | 14              | 23.7 | 8                | 27.6 | 6              | 20.0 | 14              | 17.5 | 8                | 20.0 | 6              | 15.0 |

**CONFIDENTIAL: CAMP PRIMARY OUTCOME RESULTS**  
**Table 3 (supplement). CAMP General Safety Summary**

|                              | <i>Olanzapine</i>       |          |                          |          |                        |          | <i>Quetiapine</i>       |          |                          |          |                        |          | <i>Risperidone</i>      |          |                          |          |                        |          |
|------------------------------|-------------------------|----------|--------------------------|----------|------------------------|----------|-------------------------|----------|--------------------------|----------|------------------------|----------|-------------------------|----------|--------------------------|----------|------------------------|----------|
|                              | <i>Total<br/>(N=74)</i> |          | <i>Switch<br/>(N=38)</i> |          | <i>Stay<br/>(N=36)</i> |          | <i>Total<br/>(N=59)</i> |          | <i>Switch<br/>(N=29)</i> |          | <i>Stay<br/>(N=30)</i> |          | <i>Total<br/>(N=80)</i> |          | <i>Switch<br/>(N=40)</i> |          | <i>Stay<br/>(N=40)</i> |          |
|                              | <i>N</i>                | <i>%</i> | <i>N</i>                 | <i>%</i> | <i>N</i>               | <i>%</i> | <i>N</i>                | <i>%</i> | <i>N</i>                 | <i>%</i> | <i>N</i>               | <i>%</i> | <i>N</i>                | <i>%</i> | <i>N</i>                 | <i>%</i> | <i>N</i>               | <i>%</i> |
| Akinesia                     | 9                       | 12.2     | 5                        | 13.2     | 4                      | 11.1     | 12                      | 20.3     | 4                        | 13.8     | 8                      | 26.7     | 18                      | 22.5     | 5                        | 12.5     | 13                     | 32.5     |
| Problems with sexual orgasm  | 8                       | 10.8     | 6                        | 15.8     | 2                      | 5.6      | 13                      | 22.0     | 7                        | 24.1     | 6                      | 20.0     | 18                      | 22.5     | 7                        | 17.5     | 11                     | 27.5     |
| Problems with sexual arousal | 9                       | 12.2     | 7                        | 18.4     | 2                      | 5.6      | 13                      | 22.0     | 6                        | 20.7     | 7                      | 23.3     | 16                      | 20.0     | 7                        | 17.5     | 9                      | 22.5     |
| Hypersomnia                  | 11                      | 14.9     | 6                        | 15.8     | 5                      | 13.9     | 15                      | 25.4     | 7                        | 24.1     | 8                      | 26.7     | 11                      | 13.8     | 3                        | 7.5      | 8                      | 20.0     |
| Orthostatic faintness        | 8                       | 10.8     | 4                        | 10.5     | 4                      | 11.1     | 13                      | 22.0     | 9                        | 31.0     | 4                      | 13.3     | 16                      | 20.0     | 6                        | 15.0     | 10                     | 25.0     |
| Nausea                       | 11                      | 14.9     | 5                        | 13.2     | 6                      | 16.7     | 9                       | 15.3     | 4                        | 13.8     | 5                      | 16.7     | 10                      | 12.5     | 3                        | 7.5      | 7                      | 17.5     |
| Incontinence/nocturia        | 4                       | 5.4      | 1                        | 2.6      | 3                      | 8.3      | 9                       | 15.3     | 6                        | 20.7     | 3                      | 10.0     | 9                       | 11.3     | 2                        | 5.0      | 7                      | 17.5     |
| Skin rash                    | 5                       | 6.8      |                          |          | 5                      | 13.9     | 10                      | 16.9     | 6                        | 20.7     | 4                      | 13.3     | 5                       | 6.3      | 2                        | 5.0      | 3                      | 7.5      |
| Menstrual irregularities     | 3                       | 4.1      | 3                        | 7.9      |                        |          | 6                       | 10.2     | 4                        | 13.8     | 2                      | 6.7      | 7                       | 8.8      | 3                        | 7.5      | 4                      | 10.0     |
| Sialorrhea                   | 8                       | 10.8     | 4                        | 10.5     | 4                      | 11.1     | 5                       | 8.5      | 4                        | 13.8     | 1                      | 3.3      | 2                       | 2.5      |                          |          | 2                      | 5.0      |
| Urinary hesitancy            | 2                       | 2.7      |                          |          | 2                      | 5.6      | 5                       | 8.5      | 3                        | 10.3     | 2                      | 6.7      | 2                       | 2.5      | 2                        | 5.0      |                        |          |
| Gynecomastia/galactorrhea    | 1                       | 1.4      |                          |          | 1                      | 2.8      | 2                       | 3.4      | 1                        | 3.4      | 1                      | 3.3      | 3                       | 3.8      | 1                        | 2.5      | 2                      | 5.0      |

**CONFIDENTIAL: CAMP PRIMARY OUTCOME RESULTS**  
**Table 3 (supplement). CAMP General Safety Summary**

Uses intent-to-treat population.

'Protocol-specified efficacy failure' are those participants who had either a psychiatric hospitalization, a 25 percent increase from baseline on the Positive and Negative Syndrome Scale (PANSS) (or a 10 point increase for individuals with a baseline total score of 40 or less), or substantial clinical deterioration on the Clinical Global Impressions-Change (CGI-C) Scale (i.e., 6- much worse or 7- very much worse).

'Early discontinuation of protocol-specified treatment' include both early treatment discontinuations AND participants who started/stopped/changed dose of a disallowed medication (Lipid Lowering Agent or Mood Stabilizer).

'Discontinuation of study antipsychotic due to any cause' are those participants who answered 'No' to the question 1 on the RTDA form 'Did patient complete 24 weeks on the assigned treatment?'

'Discontinuation of study antipsychotic due to inefficacy' are the participants who mentioned study treatment was stopped due to Positive Symptoms, Negative Symptoms, Mood Symptoms or Other Inefficacy/Inadequate Therapeutic Effect (question 3, values '01' to '04' on RTDA form).

'Discontinuation of study antipsychotic due to intolerability' are the participants who mentioned study treatment was stopped due to Weight, Lipids, Glucose, EPS, TD, Akathisia/activation, Sedation, Insomnia, Agitation, Sexual Side effects, Nausea, Other unacceptable side effects (question 3, values '05' to '16' on RTDA form).

'Dropped out due to withdrawn consent' are the participants who mentioned study treatment was stopped due to the patient not seeing need for treatment or patient no longer wanting to participate in the study (question 3, values '17' and '18' on RTDA form).

'Discontinuation of study antipsychotic due to other reasons' are participants where study treatment was stopped due to administrative reasons (question 3, value '21' on RTDA form).

'Death' comes from question 3, value '20' on the RTDA form.

\* Only events after randomization are included here.

+ Includes 'moderate' to 'severe' adverse events recorded post-baseline.

AE includes Adverse Events both from systematic inquiry and general inquiry.
